# Supplementary material for: The catalytic conversion of fructose to difructose anhydride
Source: Royal Society of Chemistry journal article supplement (doi:10.1039/d5gc04714e), 2025-11-26
Supplement: d5gc04714e1.zip [file esi.docx]

# **Supplemental Information**

Table S1. Comparative summary of DFA synthesis processes.

| **Entry** | **Type of process** | **Reactant/Solvent** | **Catalyst or Enzyme** | **DFA Yield, %** | **Atom Economy, %** | **Reaction Mass Efficiency, %** |
| --- | --- | --- | --- | --- | --- | --- |
| 11 | Bioenzymatic | Inulin/water | Inulin fructotransferase | 68.6 | 94.7 | 65.0 |
| 21 | Bioenzymatic | Sucrose/water | Inulin fructotransferase | 30.6 | 94.7 | 29.0 |
| 31 | Bioenzymatic | Inulin/water | Inulin fructotransferase | 82.3 | 94.7 | 78.0 |
| 42 | Catalytic-microwave | Fructose/water | Lewatit S2328 | 46.0 | 90.0 | 41.4 |
| 53 | Catalytic-CO2 | Fructose/water | Amberlyst-15 | 18.0 | 90.0 | 16.2 |
| 64 | Catalytic | Fructose/water-methyl isobutyl ketone | ITQ-2 | 5.0 | 90.0 | 4.5 |
| 74,5 | Catalytic | Fructose/water-methyl isobutyl ketone | SiO₂–SO₃H | 6.0 | 90.0 | 5.4 |
| 86 | Catalytic | Fructose/Dimethyl sulfoxide | H2SO4 | 10.0 | 90.0 | 9.0 |
| 97 | Catalytic | Fructose/1-butyl-3-methyl- imidazolium chloride | Sulfonated carbon catalyst | 28.1 | 90.0 | 25.3 |
| 10 (This work) | Catalytic | Fructose/GVL | H-Alβ25 | 75.0 | 90.0 | 67.5 |

**Materials:**

The chemical compounds and components listed below were utilized without further purification: NH4-Beta zeolite (Alfa-Aesar, SiO2/Al2O3 = 25), deionized water (Thermo Scientific MicroPure UV), nitric acid (Fisher-Chemical, 69.3 %), air (Praxair, zero grade), helium (Linde, Grade 4.5), D-fructose (Acros Organics, 99 %), D-glucose (Fisher Chemical, D16-500), 1,3-dihydroxyacetone dimer (Alfa Aesar, 97 %), 5-(hydroxymethyl)furfural (Acros Organic, 98 %), 2-furaldehyde (Across Organic, 99 %), formic acid (Acros Organic, 99 %), levulinic acid (Acros Organic, 98 %), acetic acid (Fisher Chemical A38-500, glacial), difructose anhydride (III) (Fujifilm Wako Pure Chemical Corporation, +97%), levoglucosan (Carbosynth), 1,6-anhydro-β-D-glucofuranose (Synthose), sulfuric acid (Fisher Chemical, 95.0-98.0%), triflic acid (TCI, +98%), gamma-valerolactone (Sigma Aldrich,+ 99%), ethylene carbonate (Sigma Aldrich, 98%), tetrahydrofuran (Acros Organic, 99.9%), methanol (Fisher Chemical, HPLC grade), dioxane (Acros Organic, 99%), acetone (Sigma Aldrich, HPLC grade), D-Fructose-13C6 (Sigma Aldrich, 99 atom % 13C, 99%) and D2O (Sigma Aldrich, 99.9% atom% D).

## **Methods:**

**Catalyst synthesis**

To obtain the protonated form of the zeolite (H-Alβ25), we calcined commercial ammonium form Beta zeolite in a tube furnace flowing dry air (zero air grade, previously passed through Drierite® with indicator, 8 mesh) at 150 mL/min. We heated the zeolite from room temperature to 823 K at a rate of 1 K/min and held at 823 K for 10 h.

**Catalyst characterization techniques**

Galbraith Laboratories, located in Knoxville, TN, conducted the elemental composition analysis on the H-Alβ25 sample. XRD patterns were obtained using a Bruker D8 Advance Diffractometer unit. The diffractometer is equipped with crossbeam optics and a CuKα target operating at 40 kV and 44 mA. A high-resolution diffraction pattern was collected for beta zeolites at a scanning speed of 1.20 ° min–1 and a step size of 0.02 ° in the 5–80 ° 2θ range. We utilized UV-Vis diffuse-reflectance spectroscopy to study the local aluminum environment in zeolites. To obtain the spectra, we utilized a Shimadzu UV-2600 UV-VIS spectrophotometer with an MPC-2600A Multipurpose Sample Compartment. Before recording the spectra, we dried the samples overnight at 393 K and recorded the spectra between 200-600 nm with a sampling interval of 1 nm. The blank reference was barium sulfate. To quantify the total number of acid sites (µmol g⁻¹) in the H-Alβ25 catalyst we used ammonia temperature-programmed desorption (NH₃-TPD) following the methodology described by Harris et al. 8 We saturated the surface of the samples by flowing gaseous NH3 in N2 (25 cm3 s-1 (g zeolite)-1 for 12 h. We then purged the system with a flow of He with the same flowrate for 8 h at 331 K to remove the physisorbed NH3. We ran TPD using a He flow (25 cm3 s-1 (g zeolite)-1), reaching 873 K after 0.9 h. We analyzed the effluent from the U-tube reactor with a mass spectroscopy detector (MSD) through heated transfer lines maintained at 383 K. After each TPD experiment, a 0.5 cm3 sample loop was filled with argon and injected by flow of He (25 cm3 s-1) and sent to the MSD to quantify the amount of NH3 desorbed from the integrated MSD signals and a calibrated response factor for NH3 relative to Ar. We used a Micromeritics 3-Flex high-performance gas adsorption analyzer to obtain N2 adsorption-desorption isotherms at 77 K to determine the textural properties of the materials. Prior to measurement, the samples were vacuum degassed for a whole night at 623 K. Using the consistency criterion from Rouquerol, we applied the Brunauer-Emmet-Teller (BET) technique to estimate the specific surface area.9 We employed the t-plot approach (Halsey equation) with the correction recommended by the Coasne group to ascertain the total pore and micropore volumes of the catalysts, since it yields a more precise estimate for zeolites.10, 11, 12

**Catalytic conversion of fructose**

For fructose conversion, we used 10 mL thick-walled glass reactors heated in an oil bath with a temperature control box and conical magnetic stirrers. Due to the reactants' poor solubility in most pure polar aprotic solvents, we filled the reactors with the solvent, fructose, and catalyst in situ. Teflon liners (Alltech) were then placed within the plastic caps to ensure that the reactors were kept closed. The stirring was set up at 550 rpm with autogenous pressure, and we immersed the reactors in an oil bath at the reaction temperature. Once the reaction time elapsed, the reaction was stopped by immersing the reactors in ice for three min. After that, the reaction mixture was diluted with deionized water in a 1:2 ratio to dissolve sugar molecules, as most sugars are not completely soluble in polar aprotic solvents at room temperature, then centrifuged at 2500 rpm for 15 min to separate the reaction mixture from the catalyst. Prior to each reuse, the catalysts were filtered, rinsed with plenty of water and acetone, and then dried at 393 K. After the fourth cycle, we calcined the catalyst in a tube furnace at 823 K for 2 h before utilizing it in another cycle under the same reaction conditions. For runs with helium bubbled or opened to the atmosphere, we used the same procedure as above, but we used a three-neck round-bottom flask with an oval stirrer as a reactor.

**Product analysis**

For product analysis, we obtained aliquots of product solution using a syringe and placed them in an HPLC vial after filtering through a 0.2 µm PTFE membrane. To identify and quantify the compounds, we used a Waters 2695 HPLC with an Aminex HPX-87H column coupled in series to RI-2410 and UV-486 detectors. The mobile phase was 5 mM H2SO4 at a flow rate of 0.55 mL/min. The column oven temperature was kept at 303 K.For difructose anhydride (DFA) identification, we repeatedly collected the HPLC effluent (see chromatogram in Figure S1) corresponding to the retention time of the commercial DFA (III) standard (Figure S2) from the reaction product solution. To remove H2SO4 from the HPLC mobile phase, we used AmberLite PWA15, and to remove the remaining water, the sample was deep frozen prior to freeze drying (DC801). For mass spectrometry analysis, we dissolved the isolated product in D2O. To verify the m/z of the DFA product, we used a Thermo Scientific Q Extractive Plus Quadrupole-orbitrap Mass spectrometer to conduct sodium cationization electrospray ionization experiments (Figure S12). For DFA quantification, we constructed an HPLC calibration curve using a commercial DFA(III) standard under similar column and mobile phase conditions as those used for product analysis.

Figure S1. Representative HPLC chromatogram of the catalytic conversion of fructose in gamma-valerolactone (GVL) using H-Alβ25.

.

Figure S2. HPLC chromatogram of the DFA(III) commercial standard.

We utilized the following formulas to determine fructose conversion and product yields:

*(1)*

*(2)*

*(3)*

After 15 min of reaction, we calculated the average turnover frequency (TOF) using the lowest conversions at our reaction conditions to rule out substrate-deficiency restrictions.

*(4)*

**Kinetic studies**

We used a batch reactor to study the reaction kinetics for fructose conversion on H-Alβ25. Experimental setups involved the utilization of a three-neck round-bottom flask immersed in an oil bath equipped with an oval magnetic stirrer. To eliminate water interference, we bubbled helium through the reaction solution and withdrew samples via a septum with a needle at various time intervals. To estimate the reaction order and activation energy, we used three fructose concentrations (between 0.04-0.18 M) and three reaction temperatures (383, 393, and 403 K).

To determine the kinetic parameters for the conversion of fructose using H-Alβ25, we consider the rate law for fructose:

*(5)*

where kF is the temperature-dependent reaction rate constant, and CF is the concentration of fructose. For limited ranges of concentration, a power law is commonly used:

*(6)*

And linearizing equation 6:

) *(7)*

To determine the reactor rate, we use the design equation for a constant-volume batch reactor:

*(8)*

That using the fructose conversion (xF) we can rewrite as:

*(9)*

Thus, by varying the starting fructose concentration while maintaining the same temperature and low conversions, we calculated the rate of reaction for fructose using equation 9. The slope and intercept of Equation 7 estimate the reaction order and rate constant, respectively.

Finally, the activation energy was determined using the Arrhenius equation, in which the rate constant depends on the temperature as follows:

*(10)*

And linearizing equation 10:

*(11)*

where, *EA* is the apparent activation energy of the reaction (KJ mol-1), *T* is the absolute temperature (K), *A* is the pre-exponential or frequency factor, and R is the universal gas constant (8.314 J K-1 mol-1). A plot of Ln *kF* versus 1/*T* should give a straight line. We calculate the activation energy from the slope and the pre-exponential factor from the intercept.

**Partitioning**

A sample of 400 mg of H-Alβ25 (zeolyst) that was dehydrated overnight in a 383 K oven was combined with 3 mL of a fructose and GVL-D2O mixture (all with a fructose concentration of 0.081 mol/L) in 8mL vials. To allow adsorption equilibration, we mixed the samples using a magnetic stir bar and stir plate for at least 16 h. Each sample was centrifuged at 4400 rpm for 10 min to separate liquids and solids. Quantification of the supernatant was done on an Agilent 1100/1200 series HPLC system with 1260 infinity refractive index detector at 303 K. Product separation was achieved with a Bio-Rad Aminex HPX-87H at 303 K with a mobile phase of 5 mM H2SO4 flowing at 0.55 mL/min. All sample conditions were conducted and measured in triplicate. The differential of quantities from the blank solutions and the quantification of the supernatant represents the resulting uptake of species by zeolite.

**ssNMR partitioning**

For ssNMR partitioning we dried a 50 mg sample of H-Alβ25 (zeolyst) in a 383 K oven overnight, then combined with 1.25 mL of a mixture of 99% 13C labelled fructose (Sigma), GVL, and water at ratios varying from 98 to 0% GVL, with water accounting for the differential. These samples stir for 15 min to match the reaction time, then centrifuged for 10 min to separate the solid and liquid fractions. The resulting wet solids were scooped into a zirconia 4 mm NMR rotor and capped with a torlon cap containing an O-ring to prevent the slurry from spinning out of the rotor. Solid-state NMR measurements were carried out on a Bruker Avance III 11.7 T (500 MHz) equipped with a Bruker PH MAS VT 500 standard bore BL 4 mm N-P/F-H probe and Bruker III MAS unit. Experiments were conducted at room temperature with a rotor spin rate of 5 kHz. Two methods were utilized to observe the total 13C nuclei and the absorbed nuclei. A direct polarization with a Hahn-echo sequence was used to observe the total 13C nuclei of the system.13,14 This sequence utilized a recycle delay of 3 s, 4.5 μs 90° pulse width, two rotor periods between the 90° and 180° pulses, SPINAL-64 1H proton decoupling,15 and 1024 scans. A 1H-13C cross-polarization pulse sequence was used to preferentially observe the absorbed nuclei of the system.14,16,17 This sequence utilized a 3 s recycle delay, SPINAL-64 1H proton decoupling,15 a 70-100% ramp and a 5 ms contact time. The contact time was optimized for the anomeric carbon of fructose. 13C chemical shifts were secondary referenced using the 13C chemical shifts of an adamantane standard referenced to TMS.18 The samples were packed in the 4 mm rotor under ambient conditions.

**Structure of the Zeolites**

In this study, we used H-Alβ25. The powder X-ray diffraction (XRD) patterns of this zeolite sample (Figure S1) exhibit the characteristic peaks of Beta zeolite in the protonated form after calcination.

Figure S3. XRD patterns of H-Alβ25.

The results of the UV-Vis diffuse-reflectance spectroscopy for H-Alβ25 (Figure S2) show two bands at 225 and 275 nm., which are attributed to framework and extra-framework aluminum species, respectively.19

Figure S4. UV-vis spectrum of H-Alβ25.

Table S1 displays the aluminum content and the textural properties of the H-Alβ25, showing an aluminum content of 2.97%, a specific surface area (SBET) of 660 m²/g, a microporous volume (Vmicro) of 0.03 cm³/g, and a total pore volume (VTotal) of 0.39 cm³/g. These values are consistent with those reported in the literature.20 The NH₃-TPD revealed a total acidity of 485 µmol NH₃ g⁻¹, which is within the same order of magnitude as values reported for H-Alβ with similar Si/Al ratios. 21,22 The isotherm (Figure S3) shows a combination of type IV isotherms, indicating mesoporosity, and type I isotherms, which are typical of microporous materials. Although Beta zeolites are primarily microporous, the aggregation of their particles led to the formation of mesopore-sized voids.

Table S2. Properties of H-Alβ25 zeolite.

| Sample | Si/Al (Al, %)a | Total acidity (µmol NH3 g-1)b | SBET, m2/gc | Vmicro, cm3/gd | VTotal, cm3/gd |
| --- | --- | --- | --- | --- | --- |
| H-Alβ25 | 13 (3.0) | 485 | 660 | 0.03 | 0.39 |
| H-Alβ25e |  | 468 |  |  |  |

aMeasured by ICP-OES.

bDetermined by NH3-TPD.

cTo calculate SBET we used the BET method with the Rouquerol criteria.9

dTo estimate the total pore volume and the microporous volume and surface area we used the t-plot method with the Halsey equation following Coasne criteria.10, 11

eAfter four reactions, washes, a regeneration step to show stability and reusability over multiple reaction cycles.

Figure S5. N2 adsorption-desorption isotherms for H-Alβ25.**Effect of Solvent**

Table S3. Conversions and yields for H-Alβ25 catalyzed fructose conversion with various solvents at 413 K, 1.5 wt% fructose and 2.4 µmol of aluminum sites.

| **Entry** | **Solvent** | **Time, h** | **Conversion, %** | **Yield, %** | | | | | | **CB, %** |
| --- | --- | --- | --- | --- | --- | --- | --- | --- | --- | --- |
| **GLU** | **AGP & AGF** | **DFA** | **FA & AA** | **HMF** | **FAL** |
| **1** | Water | 0.25 | 0 | - | - | - | - | - | - | - |
| **2** | Water | 1 | 0 | - | - | - | - | - | - | - |
| **3** | Water | 3 | 5.8 | 0.9 | - | - | - | 2.5 | 0.2 | 100 |
| **4** | Water | 6 | 14 | 1.6 | - | - | 0.6 | 4.9 | 0.3 | 97 |
| **5** | Water | 24 | 60 | 3.4 | - | - | 3.9 | 23 | 0.7 | 81 |
| **6** | THF | 0.25 | 34 | 3.2 | 8.0 | 3.6 | - | 1.8 | 0.3 | 100 |
| **7** | MeOH | 0.25 | 47 | 1.5 | - | 0.6 | - | 0.2 | - | 79 |
| **8** | Dioxane | 0.25 | 66 | 5.2 | 11 | 8.4 | - | 8.4 | 11 | 100 |
| **9** | Acetone | 0.25 | 77 | 3.2 | 16 | 3.1 | 0.6 | 2.6 | 4.8 | 84 |
| **10** | EC | 0.25 | 84 | 6.9 | 0.8 | 49 | 1.5 | 1.5 | 1.7 | 100 |
| **11** | GVL | 0.25 | 92 | 5.4 | 1.3 | 47 | 0.3 | 4.3 | 6.9 | 95 |
| **12** | GVL | 1 | 93 | 4.3 | 3.8 | 15 | 3.1 | 11 | 13 | 94 |
| **13** | GVL | 3 | 95 | 3.6 | 6.7 | - | 5.5 | 17 | 23 | 92 |

Note: Quantification of unidentified compounds was performed using internal standards based on their retention time (RT). Compounds eluting before the RT of DFA were quantified using DFA as the reference standard. Those eluting between the RTs of DFA and fructose were quantified using fructose. For all unidentified compounds eluting after fructose, dihydroxyacetone was used as the quantification standard. Note – GLU: glucose; AGP & AGF: 1,6-glucopyranose and 1,6-glucofuranose, respectively; DFA: difructose anhydride; FA & AA: formic and acetic acid, respectively; HMF: 5-hydroxymethylfurfural; FAL: 2-furaldehyde; CB: carbon balance; THF: tetrahydrofuran; MeOH: methanol; EC: ethylene carbonate; GVL: gamma-valerolactone.

**Catalyst stability**

For four runs (15 min of reaction each), the conversion dropped, starting at 92% and ending at 79%. The furans (5-hydroxymethylfurfural and 2-furaldehyde) yield dropped from 11% to 4.8% and the DFA yield rose from 47% to 56% during the second cycle and after decreasing up to 50%. This finding indicates that the reduction in the availability of active sites promoted the accumulation of DFA by inhibiting the formation of 5-hydroxymethylfurfural (HMF). Humins and other organic residues that had accumulated on the catalyst’s surface during the four cycles were eliminated by calcination, which was used to regenerate and complete a fifth cycle. In comparison, the regenerated H-Alβ25 catalyst showed intermediate values of 92% conversion, 50% DFA yield, and 8.4% furans production, which is a situation between the first and second cycles. This suggests that the regeneration process may have been able to regain most of the material’s catalytic activity.

**Effect of Temperature**

H-Alβ25 in GVL was used to evaluate the influence of the reaction temperature. The reaction temperature varied between 383 K and 428 K. The product distribution and fructose conversion were significantly impacted by the reaction temperature (Figure S4). The maximum DFA yield was obtained for 398 K with 60% DFA yield. When the reaction temperature rose, we saw an increase in fructose conversion, accompanied by an increase in furans yield. 2-furaldehyde yield increased faster than HMF yield when the temperature increased. If at 413 K HMF yield was 4.3%, at 428 K it was 5.7%; for 2-furaldehyde at 413 K the yield was 6.9% versus 12% at 428 K.

**
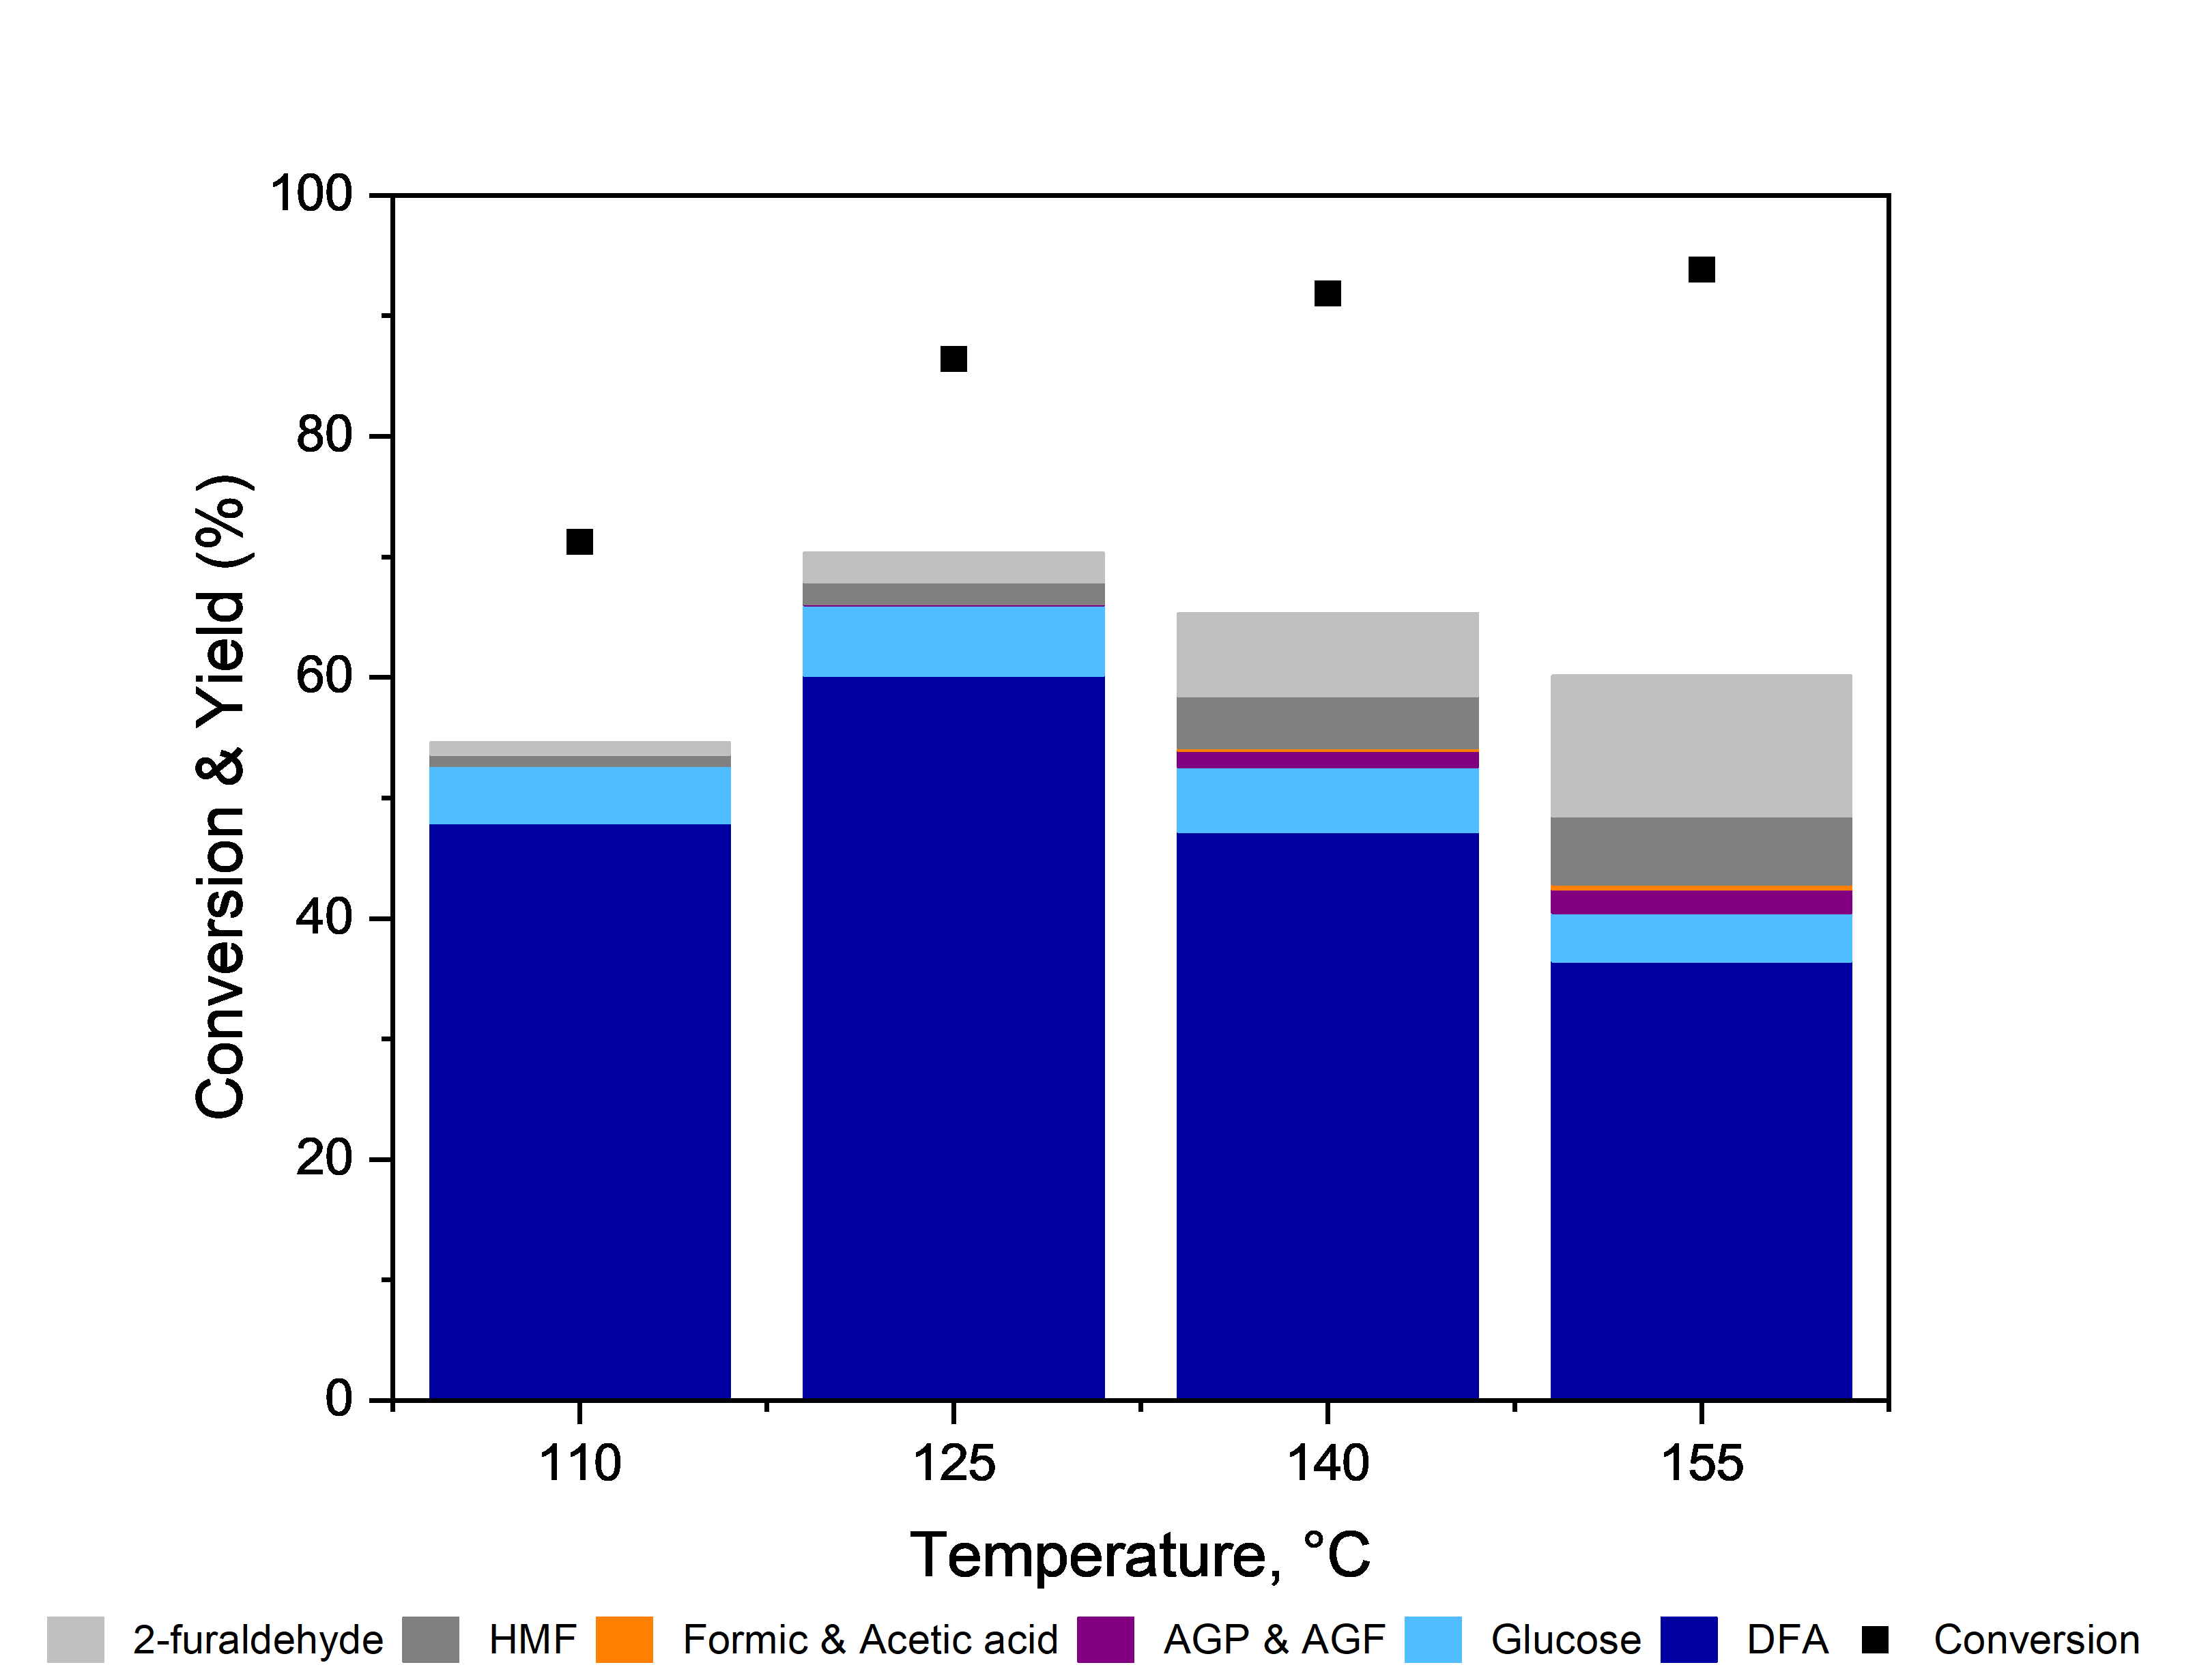
**

Figure S6 – Effect of temperature on reaction conversion and yields. Reaction conditions: 3 g of solution, 1.5 wt% fructose in GVL, 15 min and 2.4 µmol aluminum sites (H-Alβ25). Note – HMF: 5-hydroxymethylfurfural; AGP & AGF: 1,6-glucopyranose and 1,6-glucofuranose, respectively; DFA: difructose anhydride.

**Effect of fructose:catalyst ratio**

Increasing the fructose concentration from 0.75 wt% to 2.25 wt% (Figure S5) enhanced conversion from 77% to 88%. The results obtained indicate that, with greater fructose availability, a higher proportion of the reactant was converted into products, suggesting that the reaction was not yet limited by the catalytic activity in this concentration range. This increase in conversion was accompanied by an increase in DFA yield from 50% to 60%, which suggests that higher fructose concentrations favor DFA formation over the production of side products. As expected, furan yields decreased from 5.9% to 3.2%, due to a shift in reaction pathways, where increased fructose availability promoted DFA formation at the expense of furans production. However, when the fructose concentration increased beyond 1.5%, conversion plateaued, suggesting that the catalytic sites were already saturated at 1.5%. In this concentration range, the reaction may have reached a plateau where further increases in fructose availability do not result in a higher conversion, due to limitations in the number of available active sites on the catalyst.

From an economic standpoint, maintaining a high substrate-to-catalyst mass ratio is preferable. Our optimized protocol utilizes a low reaction temperature (413 K) and a high fructose: H-Alβ25 mass ratio of 92:1, achieving DFA yields of up to 63%, much higher than those reported in comparable studies, which typical ranges are 4:1 and even 2:1.6,23,24

Increasing the catalyst loading from 0.5 mg to 2.2 mg did not significantly affect fructose conversion (Figure S6), indicating that even at low catalyst loadings, there were sufficient active sites available. However, higher catalyst loadings led to decreased DFA selectivity, favoring the formation of furanic byproducts, consistent with previous findings.


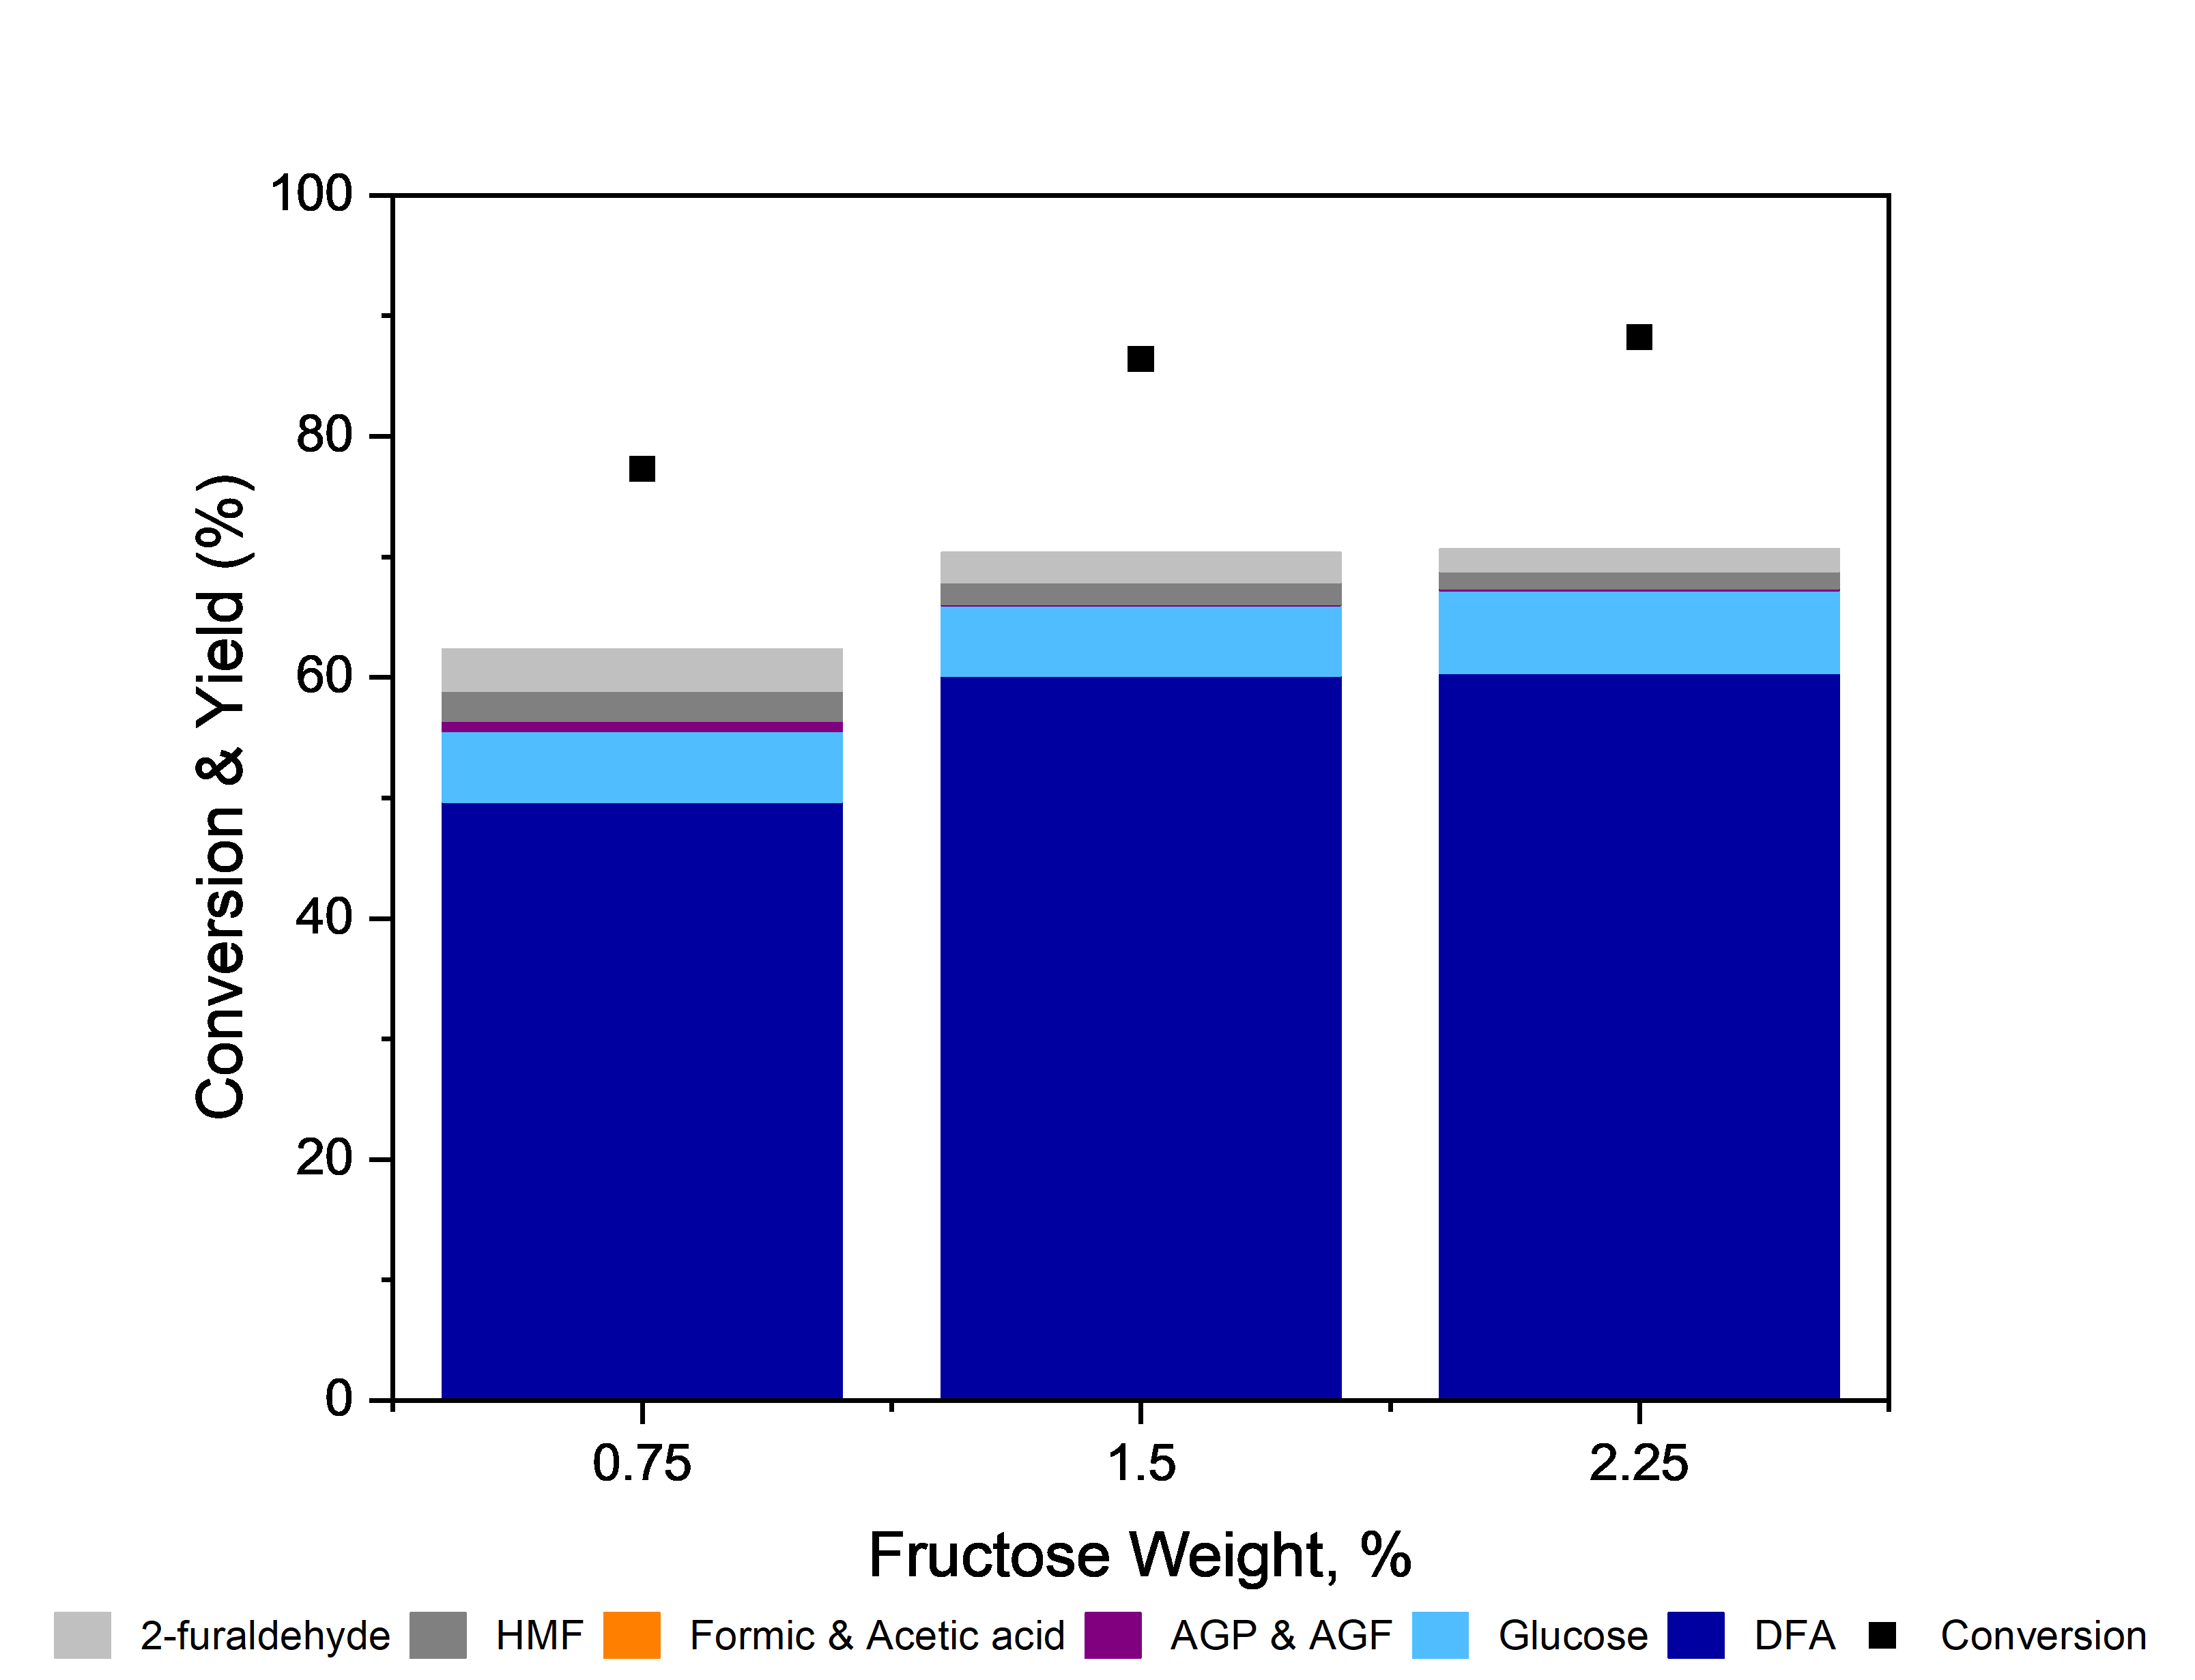


Figure S7.The effect of fructose weight percent on fructose conversion to DFA. Reaction conditions: 1.5 wt% fructose in GVL, 15 min, 398 K and 2.4 µmol of aluminum sites. Note – HMF: 5-hydroxymethylfurfural; AGP & AGF: 1,6-glucopyranose and 1,6-glucofuranose, respectively; DFA: difructose anhydride.


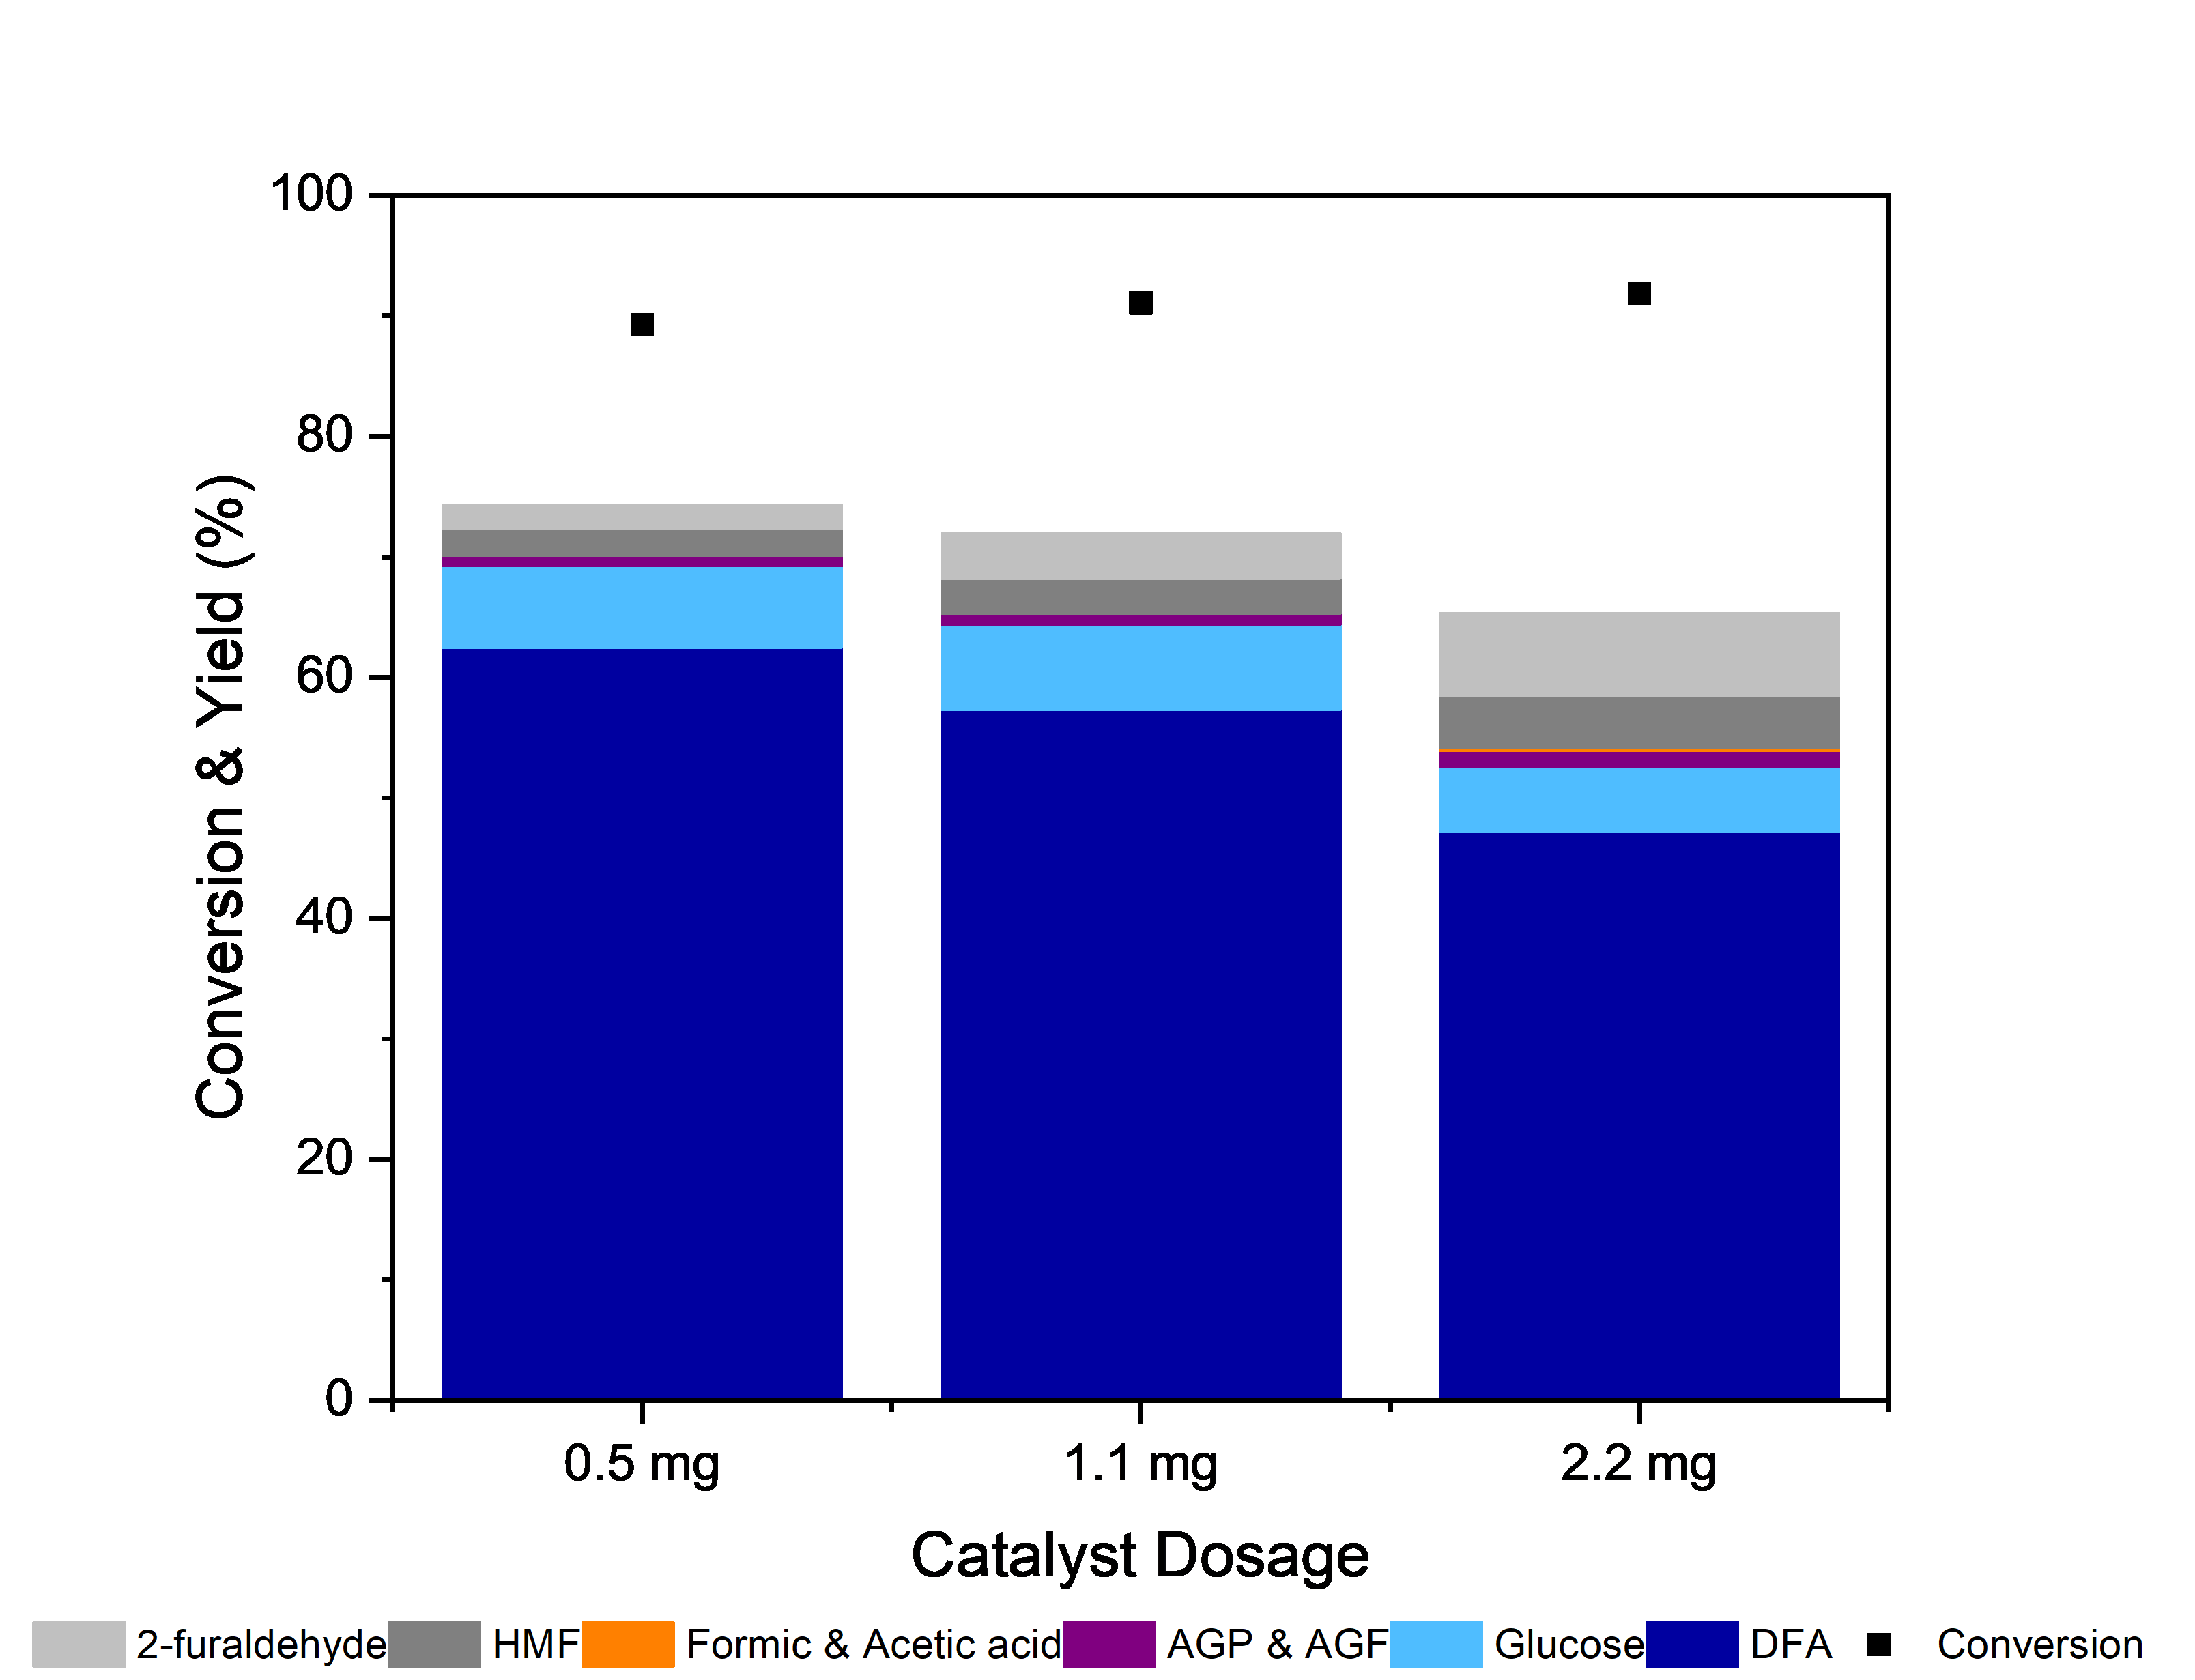


Figure S8. The effect of catalyst loading on fructose conversion to DFA. Reaction conditions: 1.5 wt% fructose in GVL, 15 min and 413 K. Note – HMF: 5-hydroxymethylfurfural; AGP & AGF: 1,6-glucopyranose and 1,6-glucofuranose, respectively; DFA: difructose anhydride.

Figure S9. Natural logarithm of the initial consumption rate of fructose as a function of the logarithm of the initial concentration of fructose using H-Alβ25 as a catalyst. These experiments were conducted within the kinetic regime.

Figure S10**.** Natural logarithm of the reaction rate constant as a function of the inverse of the temperature for the conversion of fructose using H-Alβ25 catalyst. Conditions: 0.04-0.18 M of fructose in GVL and 2.4 µmol of aluminum sites at 383, 393 and 403 K. The experimental conditions were within the kinetic regime.


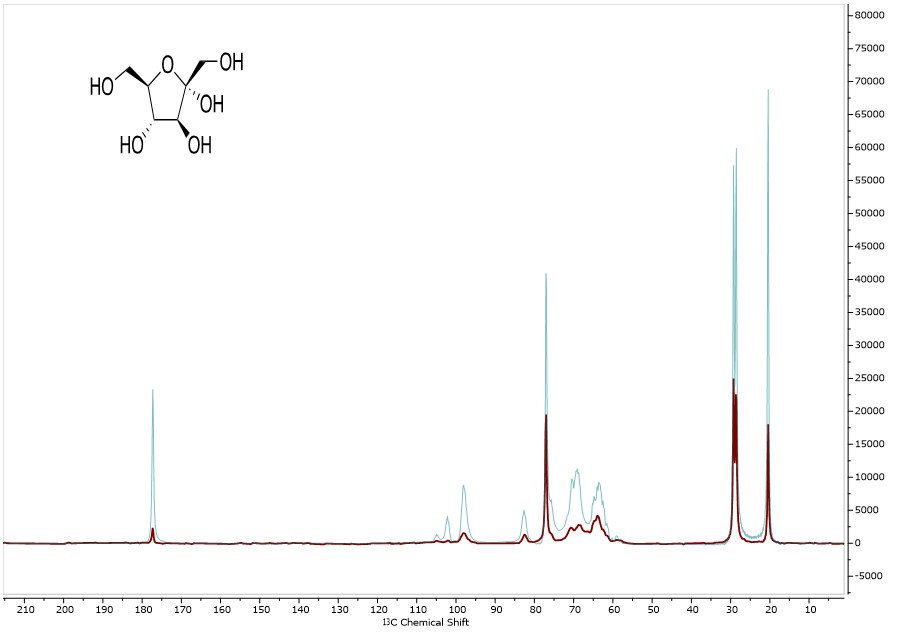


Figure S11 – Representative NMR spectra of the cross-polarization in red and direct polarization in blue for the fructose in 98:2 GVL: water condition.

**
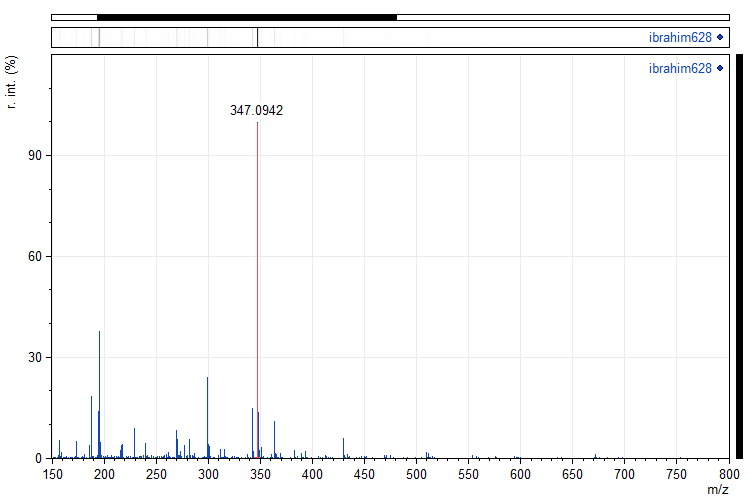
**

Figure S12. Sodium Cationization Electrospray Ionization Orbitrap Mass Spectrometry of DFA product. Mass spectrometry method creates a sodium adduct with your compound. DFA (molar mass – 324.11) + 22.99 = 347.1 m/z


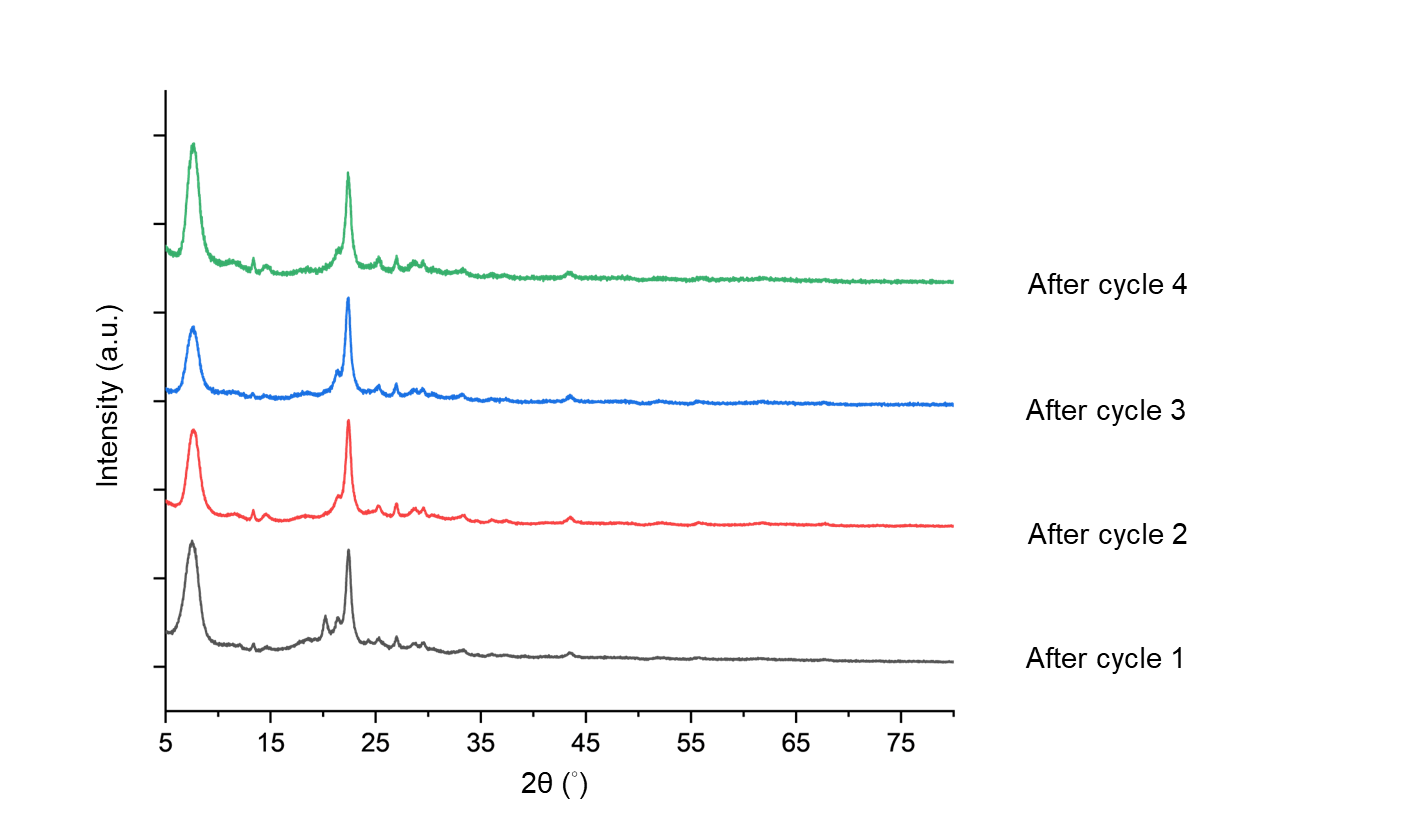


Figure S13. XRD patterns of H-Alβ25 after each reaction cycle.

**References**

(1) Cheng, M.; Wu, H.; Zhang, W.; Mu, W. Difructose Anhydride III: A 50-Year Perspective on Its Production and Physiological Functions. *Crit. Rev. Food Sci. Nutr.* **2022**, *62* (24), 6714–6725. https://doi.org/10.1080/10408398.2021.1904823.

(2) Idri, I.; Havet, J.-L.; Garcia Fernandez, J. M.; Ferroud, C.; Porte, C. Microwave-Assisted Synthesis of Prebiotic Di-D-Fructose Dianhydride-Enriched Caramels. *Food Chem.* **2012**, *134* (3), 1527–1532. https://doi.org/10.1016/j.foodchem.2012.03.068.

(3) Audemar, M.; Atencio-Genes, L.; Ortiz Mellet, C.; Jérôme, F.; Garcia Fernandez, J. M.; De Oliveira Vigier, K. Carbon Dioxide as a Traceless Caramelization Promotor: Preparation of Prebiotic Difructose Dianhydrides (DFAs)-Enriched Caramels from d -Fructose. *J. Agric. Food Chem.* **2017**, *65* (30), 6093–6099. https://doi.org/10.1021/acs.jafc.7b01601.

(4) Cheng, T.-Y.; Chao, P.-Y.; Huang, Y.-H.; Li, C.-C.; Hsu, H.-Y.; Chao, Y.-S.; Tsai, T.-C. Catalysis of Ordered Nanoporous Materials for Fructose Dehydration through Difructose Anhydride Intermediate. *Microporous Mesoporous Mater.* **2016**, *233*, 148–153. https://doi.org/10.1016/j.micromeso.2016.01.015.

(5) Huang, Y.; Chao, P.-Y.; Cheng, T.-Y.; Ho, Y.; Lin, C.-T.; Hsu, H.-Y.; Wong, J.-J.; Tsai, T.-C. Design of Sulfonated Mesoporous Silica Catalyst for Fructose Dehydration Guided by Difructose Anhydride Intermediate Incorporated Reaction Network. *Chem. Eng. J.* **2016**, *283*, 778–788. https://doi.org/10.1016/j.cej.2015.08.031.

(6) Svenningsen, G. S.; Kumar, R.; Wyman, C. E.; Christopher, P. Unifying Mechanistic Analysis of Factors Controlling Selectivity in Fructose Dehydration to 5-Hydroxymethylfurfural by Homogeneous Acid Catalysts in Aprotic Solvents. *ACS Catal.* **2018**, *8* (6), 5591–5600. https://doi.org/10.1021/acscatal.8b01197.

(7) Deshan, A. D. K.; Moghaddam, L.; Atanda, L.; Wang, H.; Bartley, J. P.; Doherty, W. O. S.; Rackemann, D. W. High Conversion of Concentrated Sugars to 5-Hydroxymethylfurfural over a Metal-Free Carbon Catalyst: Role of Glucose–Fructose Dimers. *ACS Omega* **2023**, *8* (43), 40442–40455. https://doi.org/10.1021/acsomega.3c05060.

(8) Harris, J. W.; Cordon, M. J.; Di Iorio, J. R.; Vega-Vila, J. C.; Ribeiro, F. H.; Gounder, R. Titration and Quantification of Open and Closed Lewis Acid Sites in Sn-Beta Zeolites That Catalyze Glucose Isomerization. *J. Catal.* **2016**, *335*, 141–154. https://doi.org/10.1016/j.jcat.2015.12.024.

(9) Rouquerol, J.; Llewellyn, P.; Rouquerol, F. Is the BET Equation Applicable to Microporous Adsorbents? **2007**, 49–56. https://doi.org/10.1016/S0167-2991(07)80008-5.

(10) Galarneau, A.; Mehlhorn, D.; Guenneau, F.; Coasne, B.; Minoux, D.; Aquino, C.; Dath, J. Specific Surface Area Determination for Microporous / Mesoporous Materials : The Case of Mesoporous FAU-Y Zeolites. *Langmuir* **2019**, *34*, 14134–14142.

(11) Galarneau, A.; Villemot, F.; Rodriguez, J.; Fajula, F.; Coasne, B. Validity of the T-Plot Method to Assess Microporosity in Hierarchical Micro/Mesoporous Materials. *Langmuir* **2014**, *30* (44), 13266–13274. https://doi.org/10.1021/la5026679.

(12) Lowell, S.; Shields, J. E.; Thomas, M. A.; Thommes, M. Characterization of Porous Solids and Powders-Surface Area, Pore Size and Density. *Part. Technol. Ser.* **2004**, *16*, 157–188. https://doi.org/10.1007/978-1-4020-2303-3.

(13) Hahn, E. L. Spin Echoes. *Phys. Rev.* **1950**, *80* (4), 580–594. https://doi.org/10.1103/PhysRev.80.580.

(14) Radhakrishnan, S.; Goossens, P.-J.; Magusin, P. C. M. M.; Sree, S. P.; Detavernier, C.; Breynaert, E.; Martineau, C.; Taulelle, F.; Martens, J. A. In Situ Solid-State 13C NMR Observation of Pore Mouth Catalysis in Etherification of β-Citronellene with Ethanol on Zeolite Beta. *J. Am. Chem. Soc.* **2016**, *138* (8), 2802–2808. https://doi.org/10.1021/jacs.5b13282.

(15) Fung, B. M.; Khitrin, A. K.; Ermolaev, K. An Improved Broadband Decoupling Sequence for Liquid Crystals and Solids. *J. Magn. Reson.* **2000**, *142* (1), 97–101. https://doi.org/10.1006/jmre.1999.1896.

(16) Pines, A.; Gibby, M. G.; Waugh, J. S. Proton-Enhanced Nuclear Induction Spectroscopy 13C Chemical Shielding Anisotropy in Some Organic Solids. *Chem. Phys. Lett.* **1972**, *15* (3), 373–376. https://doi.org/10.1016/0009-2614(72)80191-X.

(17) Hartmann, S. R.; Hahn, E. L. Nuclear Double Resonance in the Rotating Frame. *Phys. Rev.* **1962**, *128* (5), 2042–2053. https://doi.org/10.1103/PhysRev.128.2042.

(18) Harris, R. K.; Becker, E. D.; De Menezes, S. M. C.; Granger, P.; Hoffman, R. E.; Zilm, K. W. Further Conventions for NMR Shielding and Chemical Shifts (IUPAC Recommendations 2008). *Magn. Reson. Chem.* **2008**, *46* (6), 582–598. https://doi.org/10.1002/mrc.2225.

(19) Zanjanchi, M. A.; Razavi, A. Identification and Estimation of Extra-Framework Aluminium in Acidic Mazzite by Diffuse Reflectance Spectroscopy. *Spectrochim. Acta. A. Mol. Biomol. Spectrosc.* **2001**, *57* (1), 119–127. https://doi.org/10.1016/S1386-1425(00)00339-5.

(20) Al-Nayili, A.; Yakabi, K.; Hammond, C. Hierarchically Porous BEA Stannosilicates as Unique Catalysts for Bulky Ketone Conversion and Continuous Operation. *J. Mater. Chem. A* **2016**, *4* (4), 1373–1382. https://doi.org/10.1039/C5TA08709K.

(21) Seo, J.; Kim, D.; Lee, Y.-K. Exploring the Morphological Effect of Zeolite Beta on Catalytic Cracking of Polyethylene. *ACS Omega* **2024**, *9* (44), 44760–44769. https://doi.org/10.1021/acsomega.4c07723.

(22) Miyamoto, Y.; Katada, N.; Niwa, M. Acidity of β Zeolite with Different Si/Al2 Ratio as Measured by Temperature Programmed Desorption of Ammonia. *Microporous Mesoporous Mater.* **2000**, *40* (1), 271–281. https://doi.org/10.1016/S1387-1811(00)00264-X.

(23) Cao, Q.; Ye, T.; Li, W.; Chen, J.; Lu, Y.; Gan, H.; Wu, H.; Cao, F.; Wei, P.; Ouyang, P. Dehydration of Saccharides to Anhydro-Sugars in Dioxane: Effect of Reactants, Acidic Strength and Water Removal in Situ. *Cellulose* **2020**, *27* (17), 9825–9838. https://doi.org/10.1007/s10570-020-03490-2.

(24) Flannelly, T.; Lopes, M.; Kupiainen, L.; Dooley, S.; Leahy, J. J. Non-Stoichiometric Formation of Formic and Levulinic Acids from the Hydrolysis of Biomass Derived Hexose Carbohydrates. *RSC Adv.* **2016**, *6* (7), 5797–5804. https://doi.org/10.1039/C5RA25172A.
